# Supplementary material for: Physico-Chemical, Nutritional, and Sensory Evaluation of Two New Commercial Tomato Hybrids and Their Parental Lines
Source: MDPI journal article supplement (doi:10.3390/plants10112480), 2021-11-16
Supplement: s1 [file s1]

---

SUPPLEMENTARY MATERIALS

# Physico-Chemical, Nutritional, and Sensory Evaluation of Two New Commercial Tomato Hybrids and Their Parental Lines

Zoltán Felföldi <sup>1,2</sup>, Floricuta Ranga <sup>3</sup>, Sonia Ancuta Socaci <sup>4</sup>, Anca Farcas <sup>4</sup>, Mariola Plazas <sup>5</sup>, Adriana F. Sestras <sup>1</sup>, Dan Cristian Vodnar <sup>3</sup>, Jaime Prohens <sup>5</sup> and Radu E. Sestras <sup>1\*</sup>

<sup>1</sup> Faculty of Horticulture, University of Agricultural Sciences and Veterinary Medicine of Cluj-Napoca, 3-5 Manastur St., 400372 Cluj-Napoca, Romania; zoltan.felfoldi@usamvcluj.ro (Z.F.); adriana.sestras@usamvcluj.ro (A.F.S.)

<sup>2</sup> Private Research Station Agrosel, 268 Laminoriștilor St., 400500 Câmpia Turzii, Romania

<sup>3</sup> Department of Food Science and Technology, University of Agricultural Sciences and Veterinary Medicine of Cluj-Napoca, 3-5 Manastur St., 400372 Cluj-Napoca, Romania; floricuta.ranga@usamvcluj.ro (F.R.); dan.vodnar@usamvcluj.ro (D.C.V.)

<sup>4</sup> Department of Chemistry and Biochemistry, University of Agricultural Sciences and Veterinary Medicine of Cluj-Napoca, 3-5 Manastur St., 400372 Cluj-Napoca, Romania; sonia.socaci@usamvcluj.ro (S.A.S.); anca.farcas@usamvcluj.ro (A.F.)

<sup>5</sup> Institute for Conservation and Improvement of Valencian Agrobiodiversity (COMAV), Universitat Politècnica de València, Camí de Vera 14, 46022 Valencia, Spain; maplaav@btc.upv.es (M.P.); jprohens@btc.upv.es (J.P.);

\* Correspondence: rsestras@usamvcluj.ro (R.E.S.)

**Table S1.** Mean relative concentrations (expressed as % of total peak areas) and standard deviations (SD) of volatile compounds from tomato varieties analysed by headspace ITEX/GC-MS technique

| No. | Compound name                                          | Genotype / Mean $\pm$ SD |                  |                  |                  |                 |                 |                  |                  |
|-----|--------------------------------------------------------|--------------------------|------------------|------------------|------------------|-----------------|-----------------|------------------|------------------|
|     |                                                        | Precos F1                | AS 300 F1        | AS 30 ♀ (F7)     | AS 31 ♂ (F7)     | Addalyn F1      | AS 400 F1       | AS 09 ♀ (F7)     | AS 10 ♂ (F7)     |
| 1   | 1-Penten-3-ol                                          |                          |                  |                  |                  |                 |                 | 4.10 $\pm$ 0.38  | 10.01 $\pm$ 0.53 |
| 2   | 3-Pentanone                                            |                          |                  |                  |                  | 6.51 $\pm$ 0.44 | 8.20 $\pm$ 0.80 | 4.37 $\pm$ 0.42  | 7.32 $\pm$ 0.23  |
| 3   | Pentanal                                               | 3.78 $\pm$ 0.16          | 5.11 $\pm$ 0.72  | 6.64 $\pm$ 0.36  | 4.81 $\pm$ 0.52  |                 |                 |                  |                  |
| 4   | n-Propyl acetate                                       |                          |                  |                  | 1.19 $\pm$ 0.65  |                 |                 |                  |                  |
| 5   | 1-Butanol, 3-methyl-                                   | 2.13 $\pm$ 0.01          | 2.48 $\pm$ 0.35  | 0.95 $\pm$ 0.14  | 8.67 $\pm$ 0.69  |                 |                 | 20.96 $\pm$ 0.56 |                  |
| 6   | 1-Butanol, 2-methyl-                                   | 1.43 $\pm$ 0.14          | 1.23 $\pm$ 0.38  | 1.61 $\pm$ 0.10  | 2.07 $\pm$ 0.05  |                 |                 | 4.93 $\pm$ 0.45  |                  |
| 7   | Pentanal, 2-methyl-                                    | 0.18 $\pm$ 0.33          |                  |                  | 0.45 $\pm$ 0.08  |                 |                 |                  |                  |
| 8   | Propanoic acid, 2-methyl-, ethyl ester                 | 0.74 $\pm$ 0.16          |                  | 0.35 $\pm$ 0.14  | 0.45 $\pm$ 0.14  |                 |                 |                  |                  |
| 9   | 1-Pentanol                                             | 0.68 $\pm$ 0.16          |                  | 1.35 $\pm$ 0.37  | 1.77 $\pm$ 0.15  | 1.70 $\pm$ 0.30 |                 | 1.41 $\pm$ 0.63  |                  |
| 10  | Acetic acid, 2-methylpropyl ester                      |                          |                  |                  | 1.27 $\pm$ 0.10  |                 |                 | 0.45 $\pm$ 0.15  |                  |
| 11  | Butanoic acid, 3-methyl-, methyl ester                 |                          |                  |                  |                  |                 |                 |                  |                  |
| 12  | Hexanal                                                | 29.85 $\pm$ 1.28         | 24.11 $\pm$ 0.86 | 12.97 $\pm$ 0.41 | 30.02 $\pm$ 0.41 | 8.58 $\pm$ 0.87 | 4.11 $\pm$ 0.47 | 0.83 $\pm$ 0.33  | 1.41 $\pm$ 0.36  |
| 13  | Furfural                                               |                          |                  |                  |                  |                 |                 |                  | 1.66 $\pm$ 0.34  |
| 14  | Butanoic acid, 3-methyl-, ethyl ester                  |                          | 0.90 $\pm$ 0.17  | 0.19 $\pm$ 0.18  |                  |                 |                 |                  |                  |
| 15  | 1-Hexanol                                              | 0.25 $\pm$ 0.20          |                  | 1.08 $\pm$ 0.14  | 1.61 $\pm$ 0.12  | 2.54 $\pm$ 0.78 | 1.30 $\pm$ 0.58 | 1.62 $\pm$ 0.36  | 2.14 $\pm$ 0.60  |
| 16  | 1-Butanol, 3-methyl-, acetate                          |                          |                  |                  | 4.51 $\pm$ 0.58  |                 |                 | 17.68 $\pm$ 1.42 |                  |
| 17  | 1-Butanol, 2-methyl-, acetate                          |                          |                  |                  | 0.65 $\pm$ 0.33  |                 |                 | 1.17 $\pm$ 0.67  |                  |
| 18  | Heptanal                                               | 2.08 $\pm$ 0.07          | 0.75 $\pm$ 0.26  | 1.06 $\pm$ 0.62  | 1.76 $\pm$ 0.21  |                 |                 |                  |                  |
| 19  | 1-Butanol, 2-ethyl-                                    |                          |                  |                  |                  |                 | 1.54 $\pm$ 0.42 | 5.11 $\pm$ 0.73  | 2.90 $\pm$ 0.35  |
| 20  | Acetic acid, pentyl ester                              |                          |                  |                  | 0.19 $\pm$ 0.40  |                 |                 | 1.06 $\pm$ 0.36  |                  |
| 21  | Bicyclo[3.1.0]hex-2-ene, 2-methyl-5-(1-methylethyl)- * | 0.34 $\pm$ 0.22          |                  |                  | 0.23 $\pm$ 0.45  |                 |                 |                  |                  |
| 22  | Hexanoic acid, methyl ester                            | 0.12 $\pm$ 0.14          |                  | 0.22 $\pm$ 0.23  | 0.07 $\pm$ 0.19  |                 |                 |                  |                  |
| 23  | .alpha.-Pinene                                         | 0.85 $\pm$ 0.19          |                  | 0.15 $\pm$ 0.14  | 0.26 $\pm$ 0.36  |                 |                 |                  |                  |
| 24  | Benzene, 1-methoxy-4-methyl- *                         |                          |                  | 0.75 $\pm$ 0.34  | 0.12 $\pm$ 0.30  | 0.92 $\pm$ 0.55 |                 |                  |                  |
| 25  | 2-Heptanone, 6-methyl-                                 | 0.33 $\pm$ 0.40          |                  | 0.28 $\pm$ 0.33  |                  | 0.20 $\pm$ 0.04 | 0.28 $\pm$ 0.58 |                  |                  |
| 26  | 2-Heptenal, (Z)-                                       | 0.80 $\pm$ 0.14          | 1.13 $\pm$ 0.45  | 0.71 $\pm$ 0.17  | 0.84 $\pm$ 0.20  | 0.36 $\pm$ 0.02 |                 |                  |                  |
| 27  | Benzaldehyde                                           | 1.34 $\pm$ 0.30          | 2.76 $\pm$ 0.15  | 2.70 $\pm$ 0.14  | 0.77 $\pm$ 0.48  | 2.45 $\pm$ 0.33 | 2.84 $\pm$ 0.43 | 1.11 $\pm$ 0.31  | 2.99 $\pm$ 0.38  |

| Table 1. Chemical composition of the essential oil of <i>Thymus serpyllifolius</i> L. (Lamiaceae) by GC-MS analysis |                                                       |                      |              |              |             |              |              |             |              |
|---------------------------------------------------------------------------------------------------------------------|-------------------------------------------------------|----------------------|--------------|--------------|-------------|--------------|--------------|-------------|--------------|
| Peak number                                                                                                         | Chemical name                                         | Retention time (min) | Area (%)     | Area (%)     | Area (%)    | Area (%)     | Area (%)     | Area (%)    | Area (%)     |
| 28                                                                                                                  | Bicyclo[3.1.0]hexane, 4-methylene-1-(1-methylethyl)-* | 1.20 ± 0.16          |              | 0.20 ± 0.14  | 0.19 ± 0.32 |              |              |             |              |
| 29                                                                                                                  | Heptanol                                              |                      |              |              |             |              |              | 0.49 ± 0.10 |              |
| 30                                                                                                                  | .beta.-Pinene                                         | 3.34 ± 0.55          |              | 0.92 ± 0.29  | 0.64 ± 0.34 | 0.27 ± 0.12  |              |             |              |
| 31                                                                                                                  | 1-Octen-3-one                                         | 0.25 ± 0.28          |              |              | 0.26 ± 0.36 |              |              |             |              |
| 32                                                                                                                  | Phenol                                                | 1.19 ± 0.03          | 2.09 ± 0.04  | 2.58 ± 0.13  | 0.71 ± 0.16 | 2.47 ± 0.21  | 1.72 ± 0.49  | 1.12 ± 0.38 | 2.25 ± 0.34  |
| 33                                                                                                                  | 5-Hepten-2-one, 6-methyl-                             | 4.82 ± 0.42          | 5.62 ± 0.25  | 11.88 ± 0.40 | 6.13 ± 0.70 | 10.81 ± 1.11 | 19.52 ± 0.73 | 6.80 ± 0.28 | 19.72 ± 0.74 |
| 34                                                                                                                  | .beta.-Myrcene                                        | 10.59 ± 0.50         |              |              |             |              |              |             |              |
| 35                                                                                                                  | Furan, 2-pentyl-                                      |                      | 15.03 ± 1.07 | 13.99 ± 0.62 | 8.83 ± 0.42 | 19.59 ± 1.59 | 10.07 ± 0.69 | 7.28 ± 0.43 | 16.06 ± 0.43 |
| 36                                                                                                                  | 5-Hepten-2-ol, 6-methyl-                              |                      |              | 0.28 ± 0.33  | 0.08 ± 0.40 | 0.15 ± 0.08  |              |             |              |
| 37                                                                                                                  | trans-2-(2-Pentenyl)furan *                           | 0.28 ± 0.42          |              | 1.65 ± 0.21  | 0.16 ± 0.20 | 0.25 ± 0.36  | 0.52 ± 0.24  | 0.23 ± 0.46 | 0.35 ± 0.07  |
| 38                                                                                                                  | Hexanoic acid, ethyl ester                            | 0.24 ± 0.22          | 0.28 ± 0.19  |              | 0.53 ± 0.14 |              |              |             |              |
| 39                                                                                                                  | Octanal                                               | 2.79 ± 0.24          | 0.75 ± 0.14  |              | 1.15 ± 0.16 | 1.25 ± 0.29  |              | 0.37 ± 0.26 | 0.86 ± 0.21  |
| 40                                                                                                                  | 3-Carene                                              | 0.41 ± 0.18          |              |              |             |              | 1.32 ± 0.16  |             |              |
| 41                                                                                                                  | Acetic acid, hexyl ester                              |                      |              |              | 0.12 ± 0.13 |              |              | 0.83 ± 0.24 | 0.44 ± 0.06  |
| 42                                                                                                                  | .alpha.-Terpinene                                     | 0.29 ± 0.09          |              |              |             |              |              |             |              |
| 43                                                                                                                  | p-Cymene                                              | 10.1 ± 0.45          | 1.74 ± 0.26  | 6.22 ± 0.63  | 4.64 ± 0.14 | 7.39 ± 0.67  | 0.99 ± 0.32  | 2.50 ± 0.44 | 0.23 ± 0.08  |
| 44                                                                                                                  | 1,3,7-Octatriene, 3,7-dimethyl- *                     | 0.13 ± 0.01          |              |              |             |              |              |             |              |
| 45                                                                                                                  | .gamma.-Terpinene                                     | 5.12 ± 0.55          |              | 3.55 ± 0.14  |             | 4.16 ± 0.50  |              | 1.19 ± 0.67 |              |
| 46                                                                                                                  | 2-Octenal, (E)-                                       |                      | 4.31 ± 0.57  |              | 2.13 ± 0.48 |              | 1.26 ± 0.43  |             | 0.69 ± 0.24  |
| 47                                                                                                                  | Acetophenone                                          | 1.22 ± 0.15          | 2.40 ± 0.21  | 2.27 ± 0.19  | 0.70 ± 0.14 | 2.38 ± 0.19  | 2.97 ± 0.33  | 0.58 ± 0.14 | 2.33 ± 0.15  |
| 48                                                                                                                  | 2-Octen-1-ol                                          |                      |              |              |             | 0.99 ± 0.46  |              |             |              |
| 49                                                                                                                  | 1-Octanol                                             | 0.29 ± 0.11          |              | 1.72 ± 0.28  | 0.70 ± 0.14 | 0.77 ± 0.14  | 1.05 ± 0.07  | 2.06 ± 0.35 | 2.18 ± 0.16  |
| 50                                                                                                                  | .alpha.- Terpinolene                                  | 0.32 ± 0.12          |              |              |             |              |              |             |              |
| 51                                                                                                                  | Furan, 3-(4-methyl-3-pentenyl)-                       |                      |              | 1.28 ± 0.35  |             | 1.06 ± 0.19  | 3.70 ± 0.31  | 1.02 ± 0.40 | 3.06 ± 0.36  |
| 52                                                                                                                  | Nonanal                                               | 1.13 ± 0.24          | 0.64 ± 0.14  | 1.11 ± 0.31  | 0.89 ± 0.15 | 1.07 ± 0.42  | 1.69 ± 0.45  | 0.35 ± 0.06 | 0.94 ± 0.14  |
| 53                                                                                                                  | Octanoic acid, methyl ester                           | 0.38 ± 0.12          | 0.41 ± 0.16  | 0.28 ± 0.29  | 0.18 ± 0.33 | 0.35 ± 0.62  |              |             |              |
| 54                                                                                                                  | 2-Nonenal, (E)-                                       |                      |              | 5.24 ± 0.45  | 0.85 ± 0.25 |              |              |             |              |
| 55                                                                                                                  | Benzoic Acid                                          |                      | 16.08 ± 0.73 | 3.05 ± 0.35  | 2.09 ± 0.08 | 6.60 ± 0.8   | 23.25 ± 0.84 | 6.13 ± 0.10 | 4.12 ± 0.45  |
| 56                                                                                                                  | Octanoic Acid                                         |                      |              | 0.48 ± 0.45  | 1.00 ± 0.46 |              |              |             |              |
| 57                                                                                                                  | 1-Nonanol                                             |                      |              |              |             |              |              |             |              |
| 58                                                                                                                  | 2-Dodecanone*                                         | 0.15 ± 0.12          |              | 0.18 ± 0.38  | 0.08 ± 0.09 |              | 0.13 ± 0.29  |             |              |
| 59                                                                                                                  | Methyl Salicylate                                     |                      |              |              |             | 3.32 ± 0.39  |              |             | 3.01 ± 0.38  |
| 60                                                                                                                  | Octanoic acid, ethyl ester                            | 0.57 ± 0.13          | 0.63 ± 0.09  |              | 2.00 ± 0.31 |              |              |             |              |
| 61                                                                                                                  | Decanal                                               | 0.61 ± 0.12          | 0.62 ± 0.25  | 0.81 ± 0.29  | 0.24 ± 0.22 | 0.78 ± 0.15  | 0.88 ± 0.16  | 0.35 ± 0.07 | 0.24 ± 0.22  |
| 62                                                                                                                  | Acetic acid, octyl ester                              |                      |              |              |             |              |              | 0.78 ± 0.16 |              |
| 63                                                                                                                  | 5-Hydrxoymethylfurfural                               | 0.58 ± 0.18          | 2.97 ± 0.19  |              |             |              |              |             | 2.98 ± 0.48  |

|    |                                            |             |             |             |             |             |             |             |             |
|----|--------------------------------------------|-------------|-------------|-------------|-------------|-------------|-------------|-------------|-------------|
| 64 | Nonanoic acid                              | 0.26 ± 0.05 |             |             |             | 0.29 ± 0.12 |             |             |             |
| 65 | 2,6-Octadienal, 3,7-dimethyl-, (E)- *      | 0.24 ± 0.03 | 0.24 ± 0.17 | 0.57 ± 0.40 | 0.18 ± 0.19 | 0.26 ± 0.10 | 0.66 ± 0.07 |             | 0.35 ± 0.06 |
| 66 | Benzoic acid, 2-hydroxy-, ethyl ester      |             | 0.77 ± 0.26 |             |             |             |             |             |             |
| 67 | Ethanone, 1-[4-(1-methylethyl)phenyl]-     |             |             |             |             |             |             |             |             |
| 68 | Undecanal                                  | 0.16 ± 0.11 |             |             |             |             |             |             |             |
| 69 | 2-Undecenal                                | 0.19 ± 0.06 |             |             | 0.38 ± 0.19 |             |             |             |             |
| 70 | Dodecanal                                  | 0.17 ± 0.57 |             |             |             |             |             |             |             |
| 71 | 5,9-Undecadien-2-one, 6,10-dimethyl-, (Z)- | 1.85 ± 0.19 | 3.22 ± 0.47 | 3.45 ± 0.48 | 1.49 ± 0.33 | 3.61 ± 0.45 | 4.10 ± 0.46 | 2.12 ± 0.16 | 4.51 ± 0.26 |
| 72 | 1-Dodecanol                                | 1.90 ± 0.31 | 0.65 ± 0.35 |             |             |             |             |             |             |
| 73 | Dodecanoic acid                            | 4.32 ± 0.75 | 3.10 ± 0.56 | 7.29 ± 0.60 | 1.92 ± 0.50 | 8.94 ± 1.2  | 7.90 ± 0.38 | 2.14 ± 0.45 | 7.25 ± 0.43 |

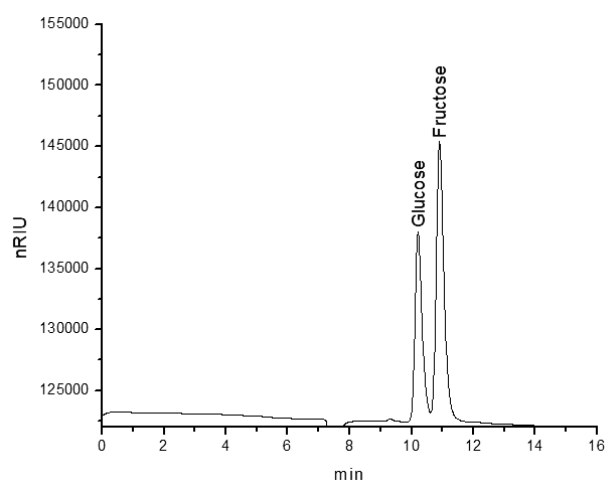

**Figure S1.** Chromatogram of carbohydrate standards and retention time: glucose  $R_t = 10.22$  min; fructose  $R_t = 10.87$  min

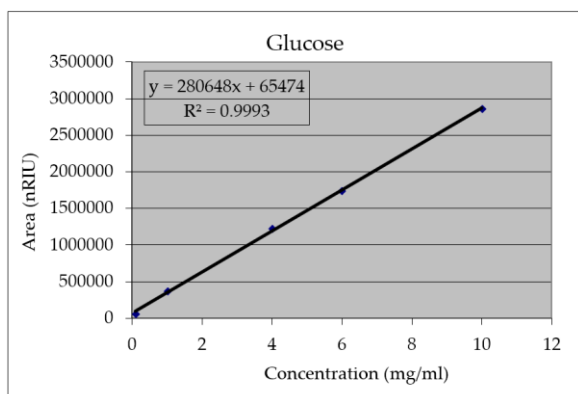

**(a)**

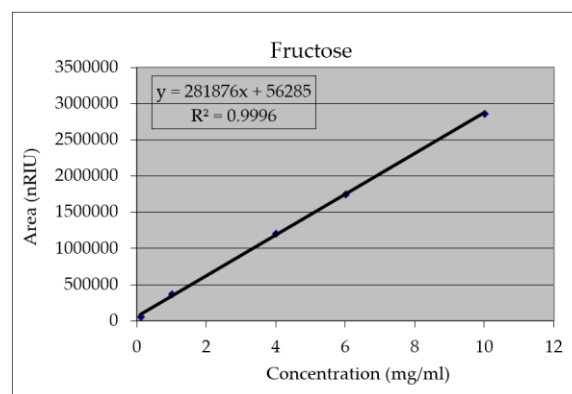

**(b)**

**Figure S2.** Calibration curves with glucose and fructose standards of 99% purity, with mg/ml concentration: (a) fructose  $R^2 = 0.9996$ ; (b) glucose  $R^2 = 0.9993$ ;  $P < 0.05$ )

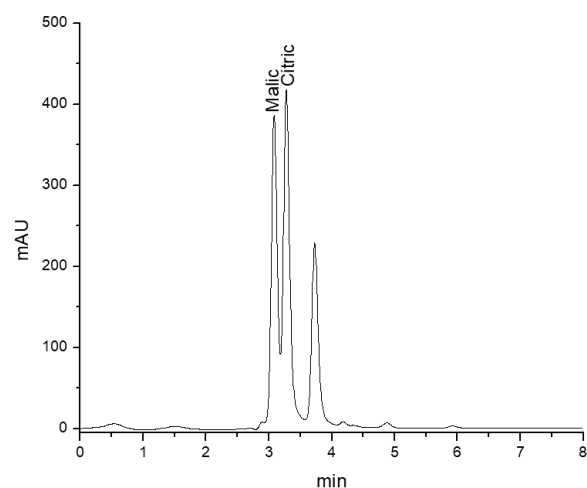

**Figure S3.** Chromatogram of organic acid standards and retention time: malic acid  $R_t = 3.08$  min, citric acid  $R_t = 3.32$  min

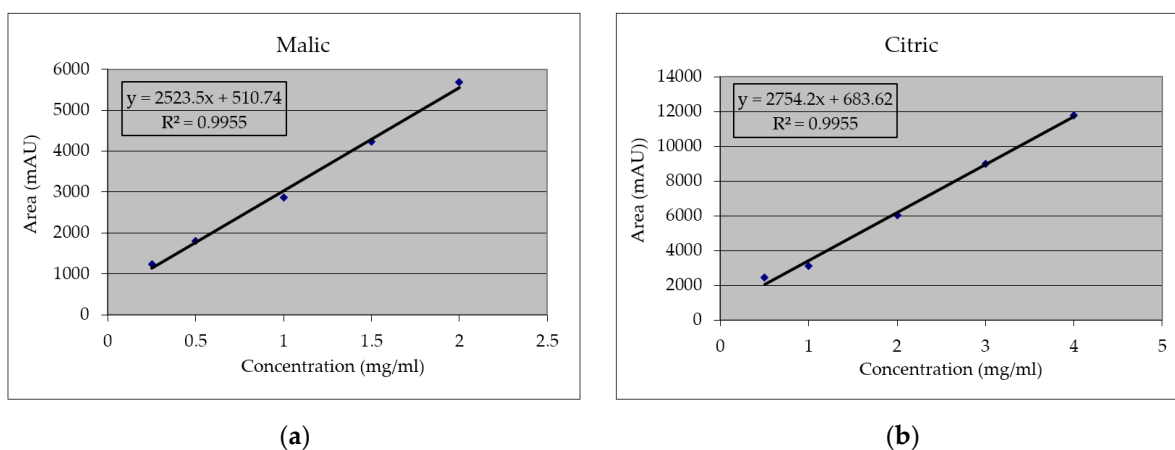

**Figure S4.** Calibration curves for organic acids by injecting five different concentrations of standard substance of 99% purity: (a) Malic acid  $R^2 = 0.9955$ ; (b) Citric acid  $R^2 = 0.9955$

**Table S2.** Identification of phenolic compounds performed after retention times, UV-Vis and mass spectra for each peak.

| Peak | Rt (min) | $\lambda_{\text{max}}$ (nm) | $[M+H]^+$ (m/z) | Phenolic compounds       | Phenolic subclasses |
|------|----------|-----------------------------|-----------------|--------------------------|---------------------|
| 1    | 10.87    | 302, 245                    | 343             | Caffeic acid-glucoside I | Hidroxicinamic acid |
| 2    | 11.85    | 312, 248                    | 343             | Caffeic acid-glucoside I | Hidroxicinamic acid |
| 3    | 12.29    | 326, 248                    | 355             | 3-Caffeoylquinic acid    | Hidroxicinamic acid |
| 4    | 12.48    | 326, 248                    | 355             | 5-Caffeoylquinic acid    | Hidroxicinamic acid |
| 5    | 13.64    | 324, 248                    | 181             | Caffeic acid             | Hidroxicinamic acid |
| 6    | 14.03    | 328, 248                    | 357             | Ferulic acid-glucoside   | Hidroxicinamic      |
| 7    | 14.68    | 355, 255                    | 743             | Quercetin-triglucoside   | Flavonol            |
| 8    | 15.69    | 354, 256                    | 611             | Quercetin-rutinoside     | Flavonol            |
| 9    | 16.03    | 330, 280                    | 580             | Naringin                 | Flavanone           |
| 10   | 17.32    | 326, 248                    | 195             | Ferulic acid             | Hidroxicinamic      |

\*Spectral values were recorded in the range 200-600 nm for all peaks, and chromatograms were recorded at the wavelength  $\lambda = 340$  nm. For the retention time (Rt) values were recorded between 10.87-17.32 min, and the mass spectrum  $[M + H]^+$  had values between 181-743 m/z.

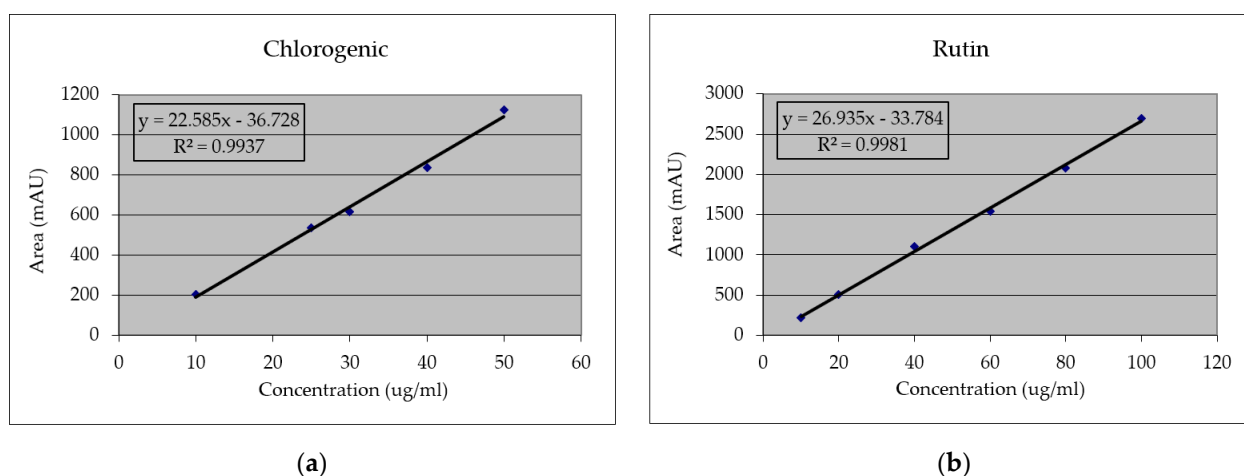

**Figure S5.** Calibration curves for total phenolic content with chlorogenic and rutin standard of 99% purity, with ug/ml concentration: (a) Chlorogenic  $R^2=0.9937$ ; (b) Rutin  $R^2=0.9981$ ,  $P<0,05$ )
